# Supplementary material
Source: ML conference proceedings conference paper supplement (https://openaccess.thecvf.com/content/CVPR2021/html/Xu_Bilateral_Grid_Learning_CVPR_2021_paper.html)
Supplement: Supplementary file 1 [file Xu_Bilateral_Grid_Learning_CVPR_2021_supplemental.pdf]

**Bilateral Grid Learning for Stereo Matching Networks  
(Supplementary Material)**

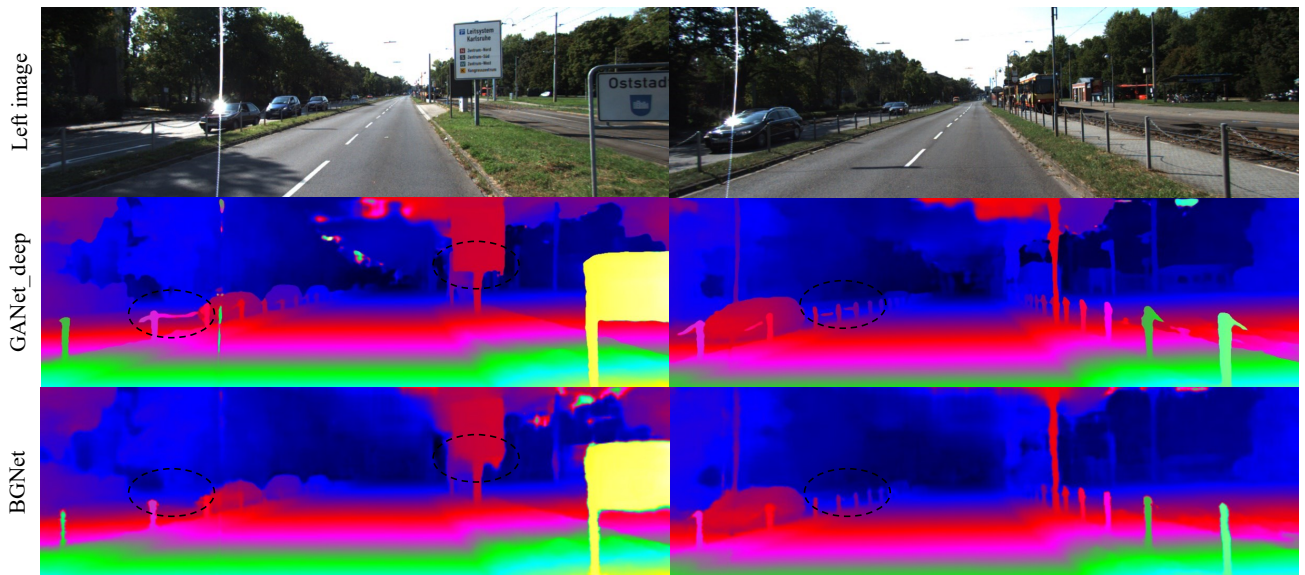

Figure 1. Failure cases of BGNet on the KITTI 2015 dataset

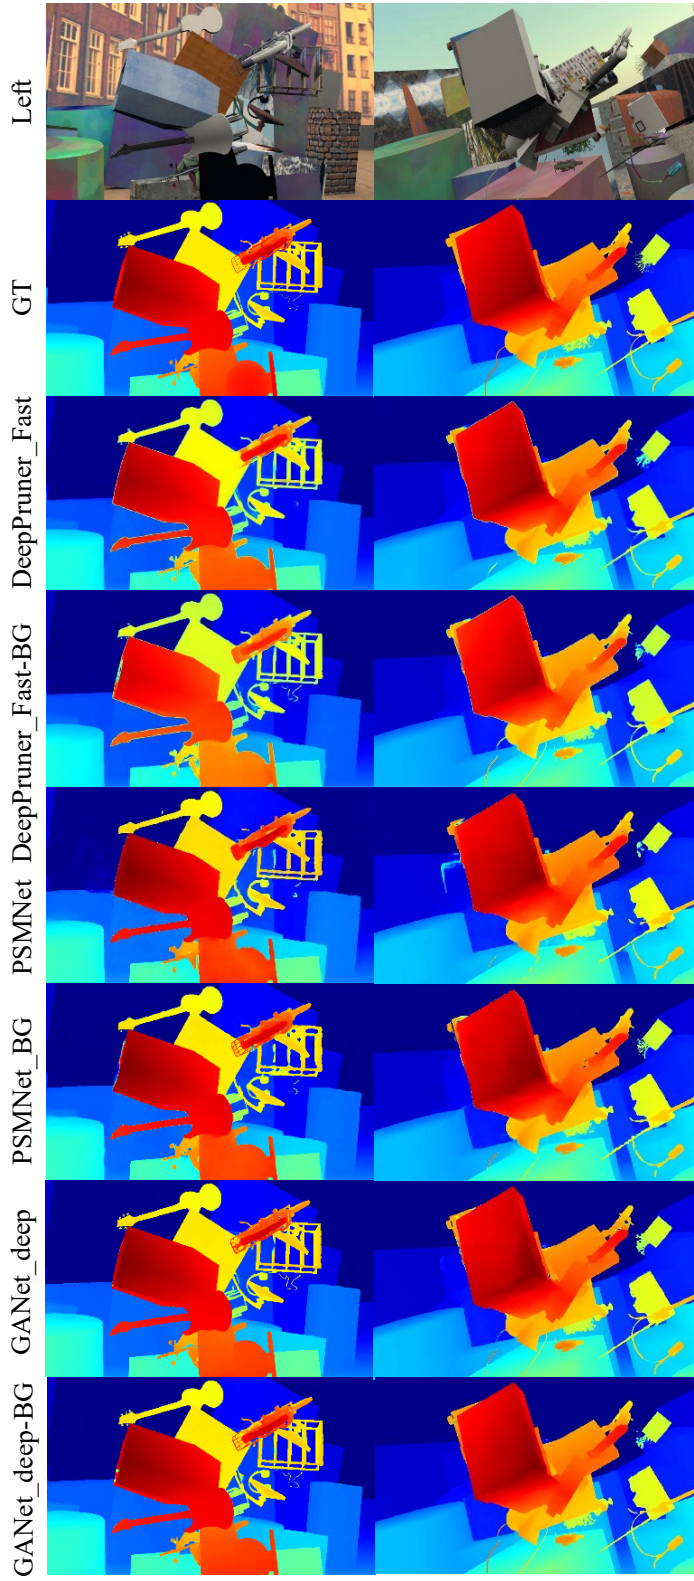

Figure 2. Qualitative results of the existing networks, before and after adding the BG module.
